# Supplementary material for: SGLT2 Inhibitor Treatment Outcome in Nonalcoholic Fatty Liver Disease Complicated with Diabetes Mellitus: The Long-term Effects on Clinical Features and Liver Histopathology
Source: PubMed Central journal article supplement — Intern Med. 2020 May 23;59(16):1931–7. doi: 10.2169/internalmedicine.4398-19 (PMC7492114; doi:10.2169/internalmedicine.4398-19), 2020-05-23
Supplement: 1349-7235-59-1931-s001.pdf [file 1349-7235-59-1931-s001.pdf]

Supplemental Table 1. Clinical parameters at the time of liver biopsies (Case 1, 2, 3, and 4)

|                                      | Case 1 (male, 64 years at 1st biopsy) |                                   |                                   | Case 2 (male, 44 years at 1st biopsy) |                           |                           | Case 3 (female, 60 years at 1st biopsy) |                                   |                                   | Case 4 (female, 63 years at 1st biopsy) |                           |                                   |
|--------------------------------------|---------------------------------------|-----------------------------------|-----------------------------------|---------------------------------------|---------------------------|---------------------------|-----------------------------------------|-----------------------------------|-----------------------------------|-----------------------------------------|---------------------------|-----------------------------------|
|                                      | 1st biopsy* (At pretreatment)         | 2nd biopsy* (At 24 weeks)         | 3rd biopsy (At 3.8 years)         | 1st biopsy* (At pretreatment)         | 2nd biopsy* (At 24 weeks) | 3rd biopsy (At 3.5 years) | 1st biopsy* (At pretreatment)           | 2nd biopsy* (At 24 weeks)         | 3rd biopsy (At 3.5 years)         | 1st biopsy* (At pretreatment)           | 2nd biopsy* (At 24 weeks) | 3rd biopsy (At 3.5 years)         |
| Physical examination                 |                                       |                                   |                                   |                                       |                           |                           |                                         |                                   |                                   |                                         |                           |                                   |
| Body mass index (kg/m <sup>2</sup> ) | 23.5                                  | 22.3                              | 23.2                              | 25.3                                  | 25.0                      | 25.2                      | 27.9                                    | 26.3                              | 27.8                              | 27.8                                    | 25.5                      | 26.2                              |
| Waist circumference (cm)             | 76.6                                  | 73.6                              | 79.2                              | 96.9                                  | 94.4                      | 96.2                      | 88.1                                    | 81.2                              | 87.2                              | 89.2                                    | 86.3                      | 87.0                              |
| Comorbidities                        |                                       |                                   |                                   |                                       |                           |                           |                                         |                                   |                                   |                                         |                           |                                   |
| Hypertention (Treatment)             | Yes (CCB)                             | Yes (CCB)                         | No                                | No                                    | No                        | No                        | No                                      | No                                | No                                | No                                      | No                        | No                                |
| Dyslipidaemia (Treatment)            | Yes (HMG-CoA reductase inhibitor)     | Yes (HMG-CoA reductase inhibitor) | Yes (HMG-CoA reductase inhibitor) | No                                    | No                        | No                        | Yes (HMG-CoA reductase inhibitor)       | Yes (HMG-CoA reductase inhibitor) | Yes (HMG-CoA reductase inhibitor) | Yes (No treatment)                      | Yes (No treatment)        | Yes (HMG-CoA reductase inhibitor) |

| Antidiabetic agents, expect for SGLT2 inhibitor   | No   | No   | No   | Yes (Sulfonylurea) | Yes (Glinide, DPP-4 inhibitor) | No   | No   | No   |
|---------------------------------------------------|------|------|------|--------------------|--------------------|--------------------|--------------------|--------------------|--------------------------------|------|------|------|
| Laboratory data                                   |      |      |      |                    |                    |                    |                    |                    |                                |      |      |      |
| Serum aspartate aminotransferase (U/L)            | 22   | 20   | 28   | 10                 | 10                 | 9                  | 19                 | 18                 | 13                             | 39   | 21   | 21   |
| Serum alanine aminotransferase (U/L)              | 24   | 17   | 45   | 17                 | 17                 | 14                 | 23                 | 27                 | 12                             | 63   | 19   | 19   |
| Alkaline phosphatase (U/L)                        | 249  | 261  | 282  | 226                | 233                | 396                | 235                | 211                | 317                            | 363  | 269  | 320  |
| Gamma-glutamyl transpeptidase (U/L)               | 42   | 35   | 57   | 42                 | 27                 | 35                 | 23                 | 19                 | 20                             | 36   | 21   | 17   |
| Estimate glomerular filtration rate (ml/min/1.73) | 64.4 | 68.5 | 64.1 | 112.5              | 106.0              | 102.3              | 88.7               | 73.0               | 82.0                           | 64.5 | 60.7 | 69.0 |

|                                              |      |      |      |          |      |      |      |      |      |      |      |      |
|----------------------------------------------|------|------|------|----------|------|------|------|------|------|------|------|------|
| m <sup>3</sup> )                             |      |      |      |          |      |      |      |      |      |      |      |      |
| Fasting plasma glucose (mg/dL)               | 126  | 106  | 107  | 265      | 182  | 281  | 180  | 140  | 161  | 106  | 97   | 108  |
| C-peptide (ng/mL)                            | 2.30 | 1.86 | 1.82 | 2.10     | 1.76 | 1.94 | 3.47 | 1.53 | 0.99 | 3.84 | 1.70 | 3.89 |
| HbA1c (%)                                    | 6.6  | 6.6  | 6.8  | 12.0     | 10.3 | 14.9 | 7.5  | 7.5  | 8.1  | 7.9  | 6.4  | 6.6  |
| HOMA-IR                                      | 4.9  | 1.7  | 2.0  | not done | 2.9  | 2.4  | 3.2  | 1.3  | 1.3  | 9.4  | 5.0  | 3.5  |
| HOMA-β (%)                                   | 65   | 42   | 47   | not done | 16   | 8    | 21   | 20   | 10   | 186  | 185  | 100  |
| Total cholesterol (mg/dL)                    | 168  | 175  | 195  | 217      | 212  | 217  | 188  | 158  | 172  | 210  | 217  | 147  |
| Triglycerides (mg/dL)                        | 232  | 103  | 173  | 153      | 288  | 198  | 191  | 136  | 244  | 105  | 85   | 99   |
| High-density lipoprotein cholesterol (mg/dL) | 40   | 55   | 53   | 37       | 44   | 40   | 45   | 44   | 55   | 37   | 38   | 30   |
| Low-density lipoprotein cholesterol (mg/dL)  | 84   | 96   | 121  | 149      | 122  | 150  | 97   | 79   | 84   | 145  | 146  | 108  |
| Uric acid (mg/dL)                            | 6.7  | 5.4  | 5.0  | 4.4      | 5.0  | 4.0  | 5.9  | 5.7  | 5.1  | 5.5  | 5.2  | 4.7  |
| Hyaluronic acid (μg/L)                       | 16   | 20   | 36   | 17       | 5    | 17   | 42   | 23   | 36   | 102  | 80   | 96   |

|                                                               |       |       |       |       |       |       |       |       |       |       |       |       |
|---------------------------------------------------------------|-------|-------|-------|-------|-------|-------|-------|-------|-------|-------|-------|-------|
| Type IV collagen 7S (ng/mL)                                   | 4.4   | 3.0   | 4.2   | 4.4   | 2.3   | 4.9   | 3.8   | 2.9   | 3.6   | 4.9   | 4.2   | 4.1   |
| Procollagen III peptide (U/mL)                                | 0.54  | 0.60  | 0.60  | <0.50 | <0.50 | <0.50 | <0.50 | 0.70  | 0.60  | 0.70  | 0.70  | 0.60  |
| High sensitive C-reactive protein (mg/dL)                     | 0.081 | 0.150 | 0.072 | 0.026 | 0.026 | 0.020 | 0.062 | 0.084 | 0.123 | 0.075 | 0.063 | 0.064 |
| Serum ferritin (µg/L)                                         | 233   | 123   | 208   | 259   | 183   | 187   | 202   | 99    | 50    | 602   | 298   | 216   |
| Fibrosis-4 index                                              | 1.15  | 1.40  | 1.45  | 0.55  | 0.67  | 0.41  | 1.04  | 0.87  | 0.91  | 2.01  | 1.46  | 1.66  |
| Imaging                                                       |       |       |       |       |       |       |       |       |       |       |       |       |
| Liver stiffness measurement with transient elastography (kPa) | 5.8   | 4.9   | 3.5   | 4.2   | 2.9   | 5.0   | 5.1   | 3.6   | 6.3   | 9.9   | 6.8   | 5.2   |
| Liver fat with magnetic                                       | 12.1  | 6.7   | 11.8  | 13.6  | 9.7   | 2.8   | 8.9   | 4.2   | 14.0  | 16.5  | 11.5  | 9.7   |

resonance  
spectroscopy  
(%)

---

\*Results of 1st and 2nd liver biopsies, are based on the previous prospective study (Reference 8,9).

CCB; Calcium channel blocker, DPP-4; dipeptidyl-peptidase 4, HMG-CoA; 3-hydroxy-3-methylglutaryl-coenzyme A.
