# Supplementary material for: SGLT2 Inhibitor Treatment Outcome in Nonalcoholic Fatty Liver Disease Complicated with Diabetes Mellitus: The Long-term Effects on Clinical Features and Liver Histopathology
Source: PubMed Central journal article supplement — Intern Med. 2020 May 23;59(16):1931–7. doi: 10.2169/internalmedicine.4398-19 (PMC7492114; doi:10.2169/internalmedicine.4398-19), 2020-05-23
Supplement: 1349-7235-59-1931-s002.pdf [file 1349-7235-59-1931-s002.pdf]

Supplemental Table 2. Clinical parameters at the time of liver biopsies (Case 5, 6, and 7)

|                                                 | Case 5 (male, 60 years at 1st biopsy) |                                   |                                   | Case 6 (male, 53 years at 1st biopsy) |                                  |                                  | Case 7 (male, 55 years at 1st biopsy) |                              |                              | 1st vs. 2nd<br><i>P</i> ** | 2nd vs. 3rd<br><i>P</i> ** | 1st vs. 3rd<br><i>P</i> ** |
|-------------------------------------------------|---------------------------------------|-----------------------------------|-----------------------------------|---------------------------------------|----------------------------------|----------------------------------|---------------------------------------|------------------------------|------------------------------|----------------------------|----------------------------|----------------------------|
|                                                 | 1st biopsy*<br>(At pretreatment)      | 2nd biopsy*<br>(At 24 weeks)      | 3rd biopsy<br>(At 3.5 years)      | 1st biopsy*<br>(At pretreatment)      | 2nd biopsy*<br>(At 24 weeks)     | 3rd biopsy<br>(At 1.7 years)     | 1st biopsy*<br>(At pretreatment)      | 2nd biopsy*<br>(At 24 weeks) | 3rd biopsy<br>(At 3.5 years) |                            |                            |                            |
| <b>Physical examination</b>                     |                                       |                                   |                                   |                                       |                                  |                                  |                                       |                              |                              |                            |                            |                            |
| Body mass index (kg/m <sup>2</sup> )            | 29.0                                  | 27.4                              | 29.2                              | 36.9                                  | 34.2                             | 36.5                             | 31.1                                  | 28.9                         | 29.5                         | 0.018                      | 0.018                      | 0.063                      |
| Waist circumference (cm)                        | 102.3                                 | 98.5                              | 106.3                             | 121.3                                 | 115.6                            | 118.5                            | 94.2                                  | 90.3                         | 90.6                         | 0.018                      | 0.018                      | 0.612                      |
| <b>Comorbidities</b>                            |                                       |                                   |                                   |                                       |                                  |                                  |                                       |                              |                              |                            |                            |                            |
| Hypertention (Treatment)                        | Yes (ARB, CCB)                        | Yes (ARB, CCB)                    | Yes (ARB, CCB)                    | Yes (ARB, CCB)                        | Yes (ARB, CCB)                   | Yes (ARB, CCB)                   | Yes (ARB, CCB)                        | Yes (CCB)                    | Yes (CCB)                    |                            |                            |                            |
| Dyslipidaemia (Treatment)                       | Yes (HMG-CoA reductase inhibitor)     | Yes (HMG-CoA reductase inhibitor) | Yes (HMG-CoA reductase inhibitor) | Yes (ω-3 carboxylic acids)            | Yes (ω-3 carboxylic acids)       | Yes (ω-3 carboxylic acids)       | No                                    | No                           | No                           |                            |                            |                            |
| Antidiabetic agents, expect for SGLT2 inhibitor | Yes (DPP-4 inhibitor, Metformin)      | Yes (DPP-4 inhibitor, Metformin)  | Yes (DPP-4 inhibitor, Metformin)  | Yes (DPP-4 inhibitor, Metformin)      | Yes (DPP-4 inhibitor, Metformin) | Yes (DPP-4 inhibitor, Metformin) | Yes (Metformin)                       | Yes (Metformin)              | Yes (Metformin)              |                            |                            |                            |

|                                                                              |       | Metformin<br>) | Sulfonylure<br>a) |      | Metformin<br>n) | Metformin<br>n) |      |      |      |       |       |       |  |
|------------------------------------------------------------------------------|-------|----------------|-------------------|------|-----------------|-----------------|------|------|------|-------|-------|-------|--|
| Laboratory data                                                              |       |                |                   |      |                 |                 |      |      |      |       |       |       |  |
| Serum aspartate<br>aminotransferase (U/L)                                    | 32    | 23             | 66                | 174  | 67              | 90              | 53   | 27   | 26   | 0.028 | 0.344 | 0.352 |  |
| Serum alanine<br>aminotransferase (U/L)                                      | 50    | 29             | 88                | 294  | 127             | 149             | 83   | 41   | 45   | 0.046 | 0.173 | 0.271 |  |
| Alkaline<br>phosphatase (U/L)                                                | 191   | 165            | 212               | 205  | 141             | 169             | 171  | 237  | 206  | 0.398 | 0.063 | 0.398 |  |
| Gamma-glutamyl<br>transpeptidase (U/L)                                       | 46    | 22             | 55                | 118  | 73              | 82              | 42   | 59   | 46   | 0.128 | 0.237 | 0.612 |  |
| Estimate<br>glomerular<br>filtration rate<br>(ml/min/1.73m <sup>3</sup><br>) | 102.9 | 89.9           | 77.5              | 79.2 | 71.4            | 71.9            | 62.8 | 57.0 | 61.8 | 0.043 | 0.735 | 0.063 |  |
| Fasting plasma<br>glucose (mg/dL)                                            | 134   | 119            | 133               | 156  | 119             | 136             | 133  | 108  | 125  | 0.018 | 0.018 | 0.176 |  |
| C-peptide<br>(ng/mL)                                                         | 3.79  | 3.31           | 3.58              | 4.38 | 3.44            | 3.78            | 2.18 | 3.46 | 3.36 | 0.128 | 0.398 | 0.237 |  |
| HbA1c (%)                                                                    | 7.3   | 6.7            | 7.9               | 8.6  | 6.7             | 7.0             | 6.5  | 6.2  | 7.3  | 0.04  | 0.01  | 0.61  |  |

|                                              |       |       |       |       |       |       |       |       |       |      |      |      |
|----------------------------------------------|-------|-------|-------|-------|-------|-------|-------|-------|-------|------|------|------|
|                                              |       |       |       |       |       |       |       |       |       | 3    | 8    | 1    |
| HOMA-IR                                      | 5.0   | 2.9   | 3.3   | 8.2   | 6.4   | 8.0   | 6.8   | 5.2   | 5.5   | 0.02 | 0.75 | 0.02 |
|                                              |       |       |       |       |       |       |       |       |       | 8    | 2    | 8    |
| HOMA-β (%)                                   | 90    | 92    | 68    | 90    | 144   | 120   | 84    | 122   | 64    | 0.46 | 0.02 | 0.24 |
|                                              |       |       |       |       |       |       |       |       |       | 2    | 8    | 9    |
| Total cholesterol (mg/dL)                    | 144   | 152   | 145   | 168   | 172   | 179   | 157   | 139   | 154   | 0.86 | 0.44 | 0.75 |
|                                              |       |       |       |       |       |       |       |       |       | 6    | 6    | 3    |
| Triglycerides (mg/dL)                        | 256   | 208   | 191   | 128   | 139   | 145   | 219   | 139   | 174   | 0.31 | 0.39 | 0.55 |
|                                              |       |       |       |       |       |       |       |       |       | 0    | 8    | 3    |
| High-density lipoprotein cholesterol (mg/dL) | 57    | 56    | 47    | 46    | 47    | 46    | 35    | 34    | 37    | 0.38 | 0.49 | 0.52 |
|                                              |       |       |       |       |       |       |       |       |       | 0    | 9    | 8    |
| Low-density lipoprotein cholesterol (mg/dL)  | 52    | 59    | 74    | 98    | 106   | 115   | 72    | 68    | 90    | 0.86 | 0.23 | 0.35 |
|                                              |       |       |       |       |       |       |       |       |       | 6    | 7    | 2    |
| Uric acid (mg/dL)                            | 6.4   | 6.3   | 6.6   | 3.9   | 4.1   | 3.6   | 6.9   | 5.1   | 4.9   | 0.23 | 0.04 | 0.02 |
|                                              |       |       |       |       |       |       |       |       |       | 7    | 2    | 8    |
| Hyaluronic acid (μg/L)                       | 18    | 23    | 53    | 130   | 94    | 97    | 13    | 20    | 12    | 0.17 | 0.04 | 0.91 |
|                                              |       |       |       |       |       |       |       |       |       | 6    | 2    | 6    |
| Type IV collagen 7S (ng/mL)                  | 21.2  | 18.6  | 25.8  | 9.6   | 7     | 9.0   | 4.1   | 3.0   | 3.7   | 0.01 | 0.02 | 0.79 |
|                                              |       |       |       |       |       |       |       |       |       | 8    | 8    | 9    |
| Procollagen III peptide (U/mL)               | 1.10  | 1.30  | 1.90  | 1.20  | 0.90  | 1.00  | 1.00  | 0.70  | 0.60  | 0.89 | 1.00 | 1.00 |
|                                              |       |       |       |       |       |       |       |       |       | 1    | 0    | 0    |
| High sensitive C-reactive                    | 0.020 | 0.015 | 0.012 | 0.163 | 0.043 | 0.062 | 0.050 | 0.137 | 0.200 | 0.75 | 0.73 | 0.73 |
|                                              |       |       |       |       |       |       |       |       |       | 3    | 5    | 5    |

|                                                                           |      |      |      |      |      |      |      |      |      |       |       |       |  |
|---------------------------------------------------------------------------|------|------|------|------|------|------|------|------|------|-------|-------|-------|--|
| protein (mg/dL)                                                           |      |      |      |      |      |      |      |      |      |       |       |       |  |
| Serum ferritin<br>(µg/L)                                                  | 1696 | 410  | 958  | 466  | 83   | 95   | 204  | 119  | 193  | 0.018 | 0.310 | 0.018 |  |
| Fibrosis-4<br>index                                                       | 1.14 | 1.19 | 1.97 | 3.38 | 1.90 | 2.69 | 2.42 | 2.13 | 1.12 | 0.237 | 0.612 | 0.398 |  |
| <b>Imaging</b>                                                            |      |      |      |      |      |      |      |      |      |       |       |       |  |
| Liver stiffness<br>measurement<br>with transient<br>elastography<br>(kPa) | 5.2  | 3.2  | 7.0  | 27.0 | 16.9 | 15.1 | 9.4  | 5.9  | 7.9  | 0.018 | 0.176 | 0.237 |  |
| Liver fat with<br>magnetic<br>resonance<br>spectroscopy<br>(%)            | 17.6 | 11.5 | 22.9 | 14.0 | 7.0  | 11.4 | 27.0 | 12.2 | 20.8 | 0.018 | 0.128 | 0.237 |  |

---

\*Results of 1st and 2nd liver biopsies, are based on the previous prospective study (Reference 8,9).

\*\*Wilcoxon test was used for comparison of paired samples of 7 patients.

ARB; Angiotensin II receptor blocker, CCB; Calcium channel blocker, DPP-4; dipeptidyl-peptidase 4, HMG-CoA; 3-hydroxy-3-methylglutaryl-coenzyme A.
